# Supplementary material for: Assessment of the association between periodontal disease and total cancer incidence and mortality: a meta-analysis
Source: PeerJ. 2022 Nov 7;10:e14320. doi: 10.7717/peerj.14320 (PMC9648345; doi:10.7717/peerj.14320)
Supplement: Supplemental Information 1 [file peerj-10-14320-s001.xlsx]

## Sheet: Breast
First author	Year	HR	LCI	UCI	Study population	Study design	Dental status	Follow-up	Adjust for smoking
Arora	2010	1.12	0.75	1.68	Europe	prospective study	Self-reported	≥10	Yes
Wen	2014	1.04	0.9	1.2	Asia	prospective study	Dental examination	≥10	No
Chung	2016	1.23	1.11	1.36	Asia	prospective study	Self-reported	<10	No
Freudenheim	2016	1.11	1	1.23	North America	prospective study	Self-reported	<10	Yes
Mai	2016	0.94	0.49	1.82	North America	prospective study	Dental examination	≥10	Yes
Dizdar	2017	2.4	0.88	5.33	Europe	prospective study	Dental examination	≥10	No
Han	2017	1.45262	0.812523	2.40581	Asia	Retrospective study	Dental examination	<10	Yes
Nwizu	2017	1.13	1.03	1.23	North America	prospective study	Self-reported	≥10	Yes
Sfreddo	2017	1.54913	1.01396	2.11389	South America	Retrospective study	Dental examination	<10	Yes
Michaud	2018	0.84	0.49	1.43	North America	prospective study	Dental examination	≥10	Yes
Güven	2019	2.19	1.71	2.77	Europe	prospective study	Dental examination	<10	No

## Sheet: Prostate
First author	Year	HR	LCI	UCI	Study population	Study design	Dental status	Follow-up	Adjust for smoking
Michaud	2008	0.89	0.71	1.1	North America	prospective study	Self-reported	≥10	Yes
Arora	2010	1.47	1.04	2.07	Europe	prospective study	Self-reported	≥10	Yes
Michaud	2016	1.17	0.94	1.47	North America	prospective study	Self-reported	≥10	Yes
Dizdar	2017	3.75	0.95	10.21	Europe	prospective study	Dental examination	≥10	No
Lee	2017	1.14	1.01	1.31	Asia	prospective study	Dental examination	≥10	Yes
Michaud	2018	1.1	0.79	1.54	North America	prospective study	Dental examination	≥10	Yes
Güven	2019	1.84	1.34	2.49	Europe	prospective study	Dental examination	<10	No

## Sheet: Lung & bronchus
First author	Year	HR	LCI	UCI	Study population	Study design	Dental status	Follow-up	Adjust for smoking
Michaud	2008	1.36	1.15	1.6	North America	prospective study	Self-reported	≥10	Yes
Mai	2014	1.25	1.06	1.48	North America	prospective study	Self-reported	≥10	Yes
Wen	2014	1.08	0.91	1.27	Asia	prospective study	Dental examination	≥10	No
Chrysanthakopoulos	2016	1.58992	0.984529	2.31428	Europe	Retrospective study	Dental examination	<10	Yes
Mai	2016	4.61	0.55	38.7	North America	prospective study	Dental examination	≥10	Yes
Michaud	2016	0.92	0.49	1.71	North America	prospective study	Self-reported	≥10	Yes
Dizdar	2017	1.7	0.43	4.64	Europe	prospective study	Dental examination	≥10	No
Han	2017	0.546791	0.163713	1.75262	Asia	Retrospective study	Dental examination	<10	Yes
Nwizu	2017	1.31	1.14	1.51	North America	prospective study	Self-reported	≥10	Yes
Michaud	2018	2.37	1.41	3.99	North America	prospective study	Dental examination	≥10	Yes
Güven(Male )	2019	0.6	0.39	0.89	Europe	prospective study	Dental examination	<10	No
Güven(Female )	2019	1.14	0.56	2.1	Europe	prospective study	Dental examination	<10	No
Lu	2019	2.51	1.45	4.33	North America	prospective study	Dental examination	<10	Yes
Tai	2019	1.9	1.08	3.35	Asia	prospective study	Self-reported	≥10	No
Yoon	2019	1.33378	1.07253	1.63989	North America	Retrospective study	Self-reported	<10	Yes

## Sheet: Colon & rectum
First author	Year	HR	LCI	UCI	Study population	Study design	Dental status	Follow-up	Adjust for smoking
Michaud	2008	1.05	0.9	1.23	North America	prospective study	Self-reported	≥10	Yes
Arora	2010	1.62	1.13	2.33	Europe	prospective study	Self-reported	≥10	Yes
Mai	2016	1.94	0.36	10.35	North America	prospective study	Dental examination	≥10	Yes
Michaud	2016	1.03	0.75	1.39	North America	prospective study	Self-reported	≥10	Yes
Han	2017	0.955446	0.540174	1.62717	Asia	Retrospective study	Dental examination	<10	Yes
Momen-Heravi	2017	1.22	0.91	1.63	North America	prospective study	Self-reported	≥10	Yes
Nwizu	2017	0.98	0.82	1.17	North America	prospective study	Self-reported	≥10	Yes
Chou	2018	0.95	0.78	1.16	Asia	prospective study	Self-reported	≥10	No
Hu	2018	1.64	1.5	1.8	Asia	prospective study	Self-reported	≥10	No
Lee	2018	1.25012	1.15709	1.341	Asia	Retrospective study	Self-reported	<10	Yes
Michaud	2018	1.51	0.9	2.52	North America	prospective study	Dental examination	≥10	Yes
Güven(Male )	2019	0.99	0.56	1.62	Europe	prospective study	Dental examination	<10	No
Güven(Female)	2019	0.71	0.33	1.36	Europe	prospective study	Dental examination	<10	No
Lu	2019	1.77	1.03	3.05	North America	prospective study	Dental examination	<10	Yes

## Sheet: Total cancer
First author	Year	HR	LCI	UCI	Study population	Study design	Dental status	Follow-up	Adjust for smoking
Michaud	2008	1.14	1.07	1.22	North America	prospective study	Self-reported	≥10	Yes
Arora	2010	1.15	1.01	1.32	Europe	prospective study	Self-reported	≥10	Yes
Wen	2014	1.05	1	1.11	Asia	prospective study	Dental examination	≥10	No
Chung	2016	1.23	1.2	1.27	Asia	prospective study	Self-reported	<10	No
Mai	2016	1.2	0.77	1.86	North America	prospective study	Dental examination	≥10	Yes
Michaud	2016	1.13	1.01	1.27	North America	prospective study	Self-reported	≥10	Yes
Dizdar	2017	1.77	1.17	2.58	Europe	prospective study	Dental examination	≥10	No
Han	2017	0.835596	0.569432	1.19388	Asia	Retrospective study	Dental examination	<10	Yes
Nwizu	2017	1.14	1.08	1.2	North America	prospective study	Self-reported	≥10	Yes
Michaud	2018	1.06	0.9	1.25	North America	prospective study	Dental examination	≥10	Yes
Güven	2019	1.11	0.95	1.28	Europe	prospective study	Dental examination	<10	No
Güven	2019	1.24	1.05	1.45	Europe	prospective study	Dental examination	<10	No
Lu	2019	1.09	0.92	1.3	North America	prospective study	Dental examination	<10	Yes
