# Supplementary material for: Assessment of the association between periodontal disease and total cancer incidence and mortality: a meta-analysis
Source: PeerJ. 2022 Nov 7;10:e14320. doi: 10.7717/peerj.14320 (PMC9648345; doi:10.7717/peerj.14320)
Supplement: Supplemental Information 2 [file peerj-10-14320-s002.xlsx]

## Sheet: Breast
First author	Year	HR	LCI	UCI
Hujoel	2003	1.3166	0.741557	2.35377
Heikkilä	2018	1.19	0.66	2.12

## Sheet: Prostate
First author	Year	HR	LCI	UCI
Hujoel	2003	1.80741	0.760322	4.31454
Heikkilä	2018	1.75	0.63	4.87

## Sheet: Lung & bronchus
First author	Year	HR	LCI	UCI
Hujoel	2003	1.92811	1.15878	3.21236
Heikkilä	2018	1.2	0.81	1.8

## Sheet: Colon & rectum
First author	Year	HR	LCI	UCI
Hujoel	2003	0.910455	0.491392	1.69342
Ahn	2012	3.58	1.15	11.16

## Sheet: Total cancer
First author	Year	HR	LCI	UCI
Hujoel	2003	1.55	1.25	1.92
Heikkilä	2018	1.33	1.1	1.58
Lu	2019	1.39	1.02	1.89
Huang	2020	1.23	0.62	2.45
